# Supplementary material for: Comparison of Actual and Time-Optimized Flight Trajectories in the Context of the In-Service Aircraft for a Global Observing System (IAGOS) Programme
Source: MDPI journal article supplement (doi:10.3390/aerospace10090744), 2023-08-23
Supplement: s1 [file s1]

**This Supplementary Material includes  
figures S1–S3 and Table S1.**

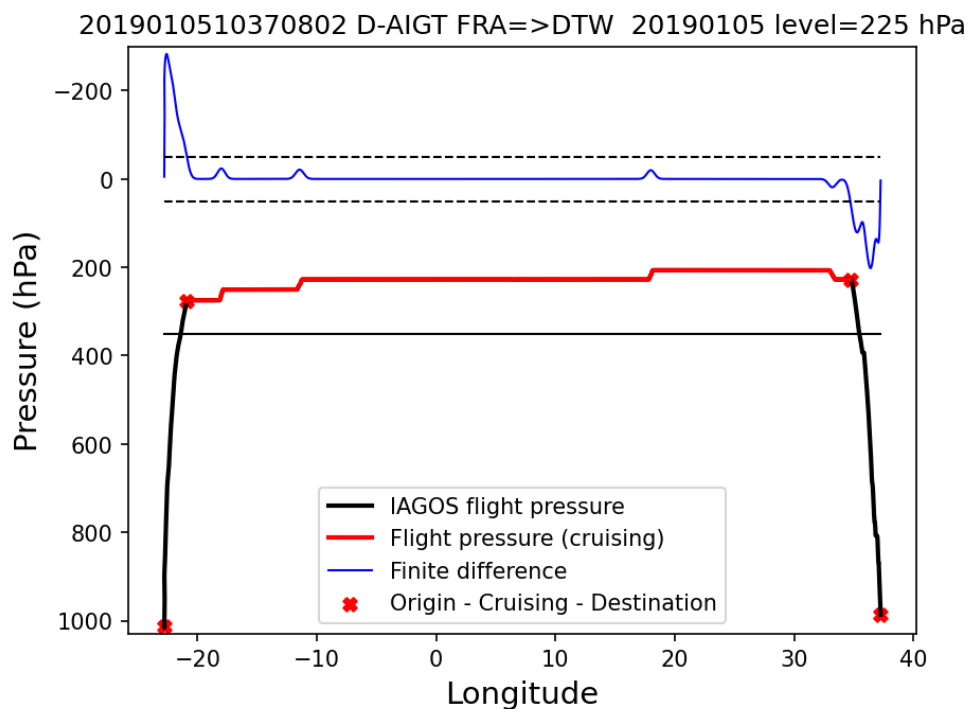

**Figure S1.** Cross-section of the flight pressure along the longitude of a sampled IAGOS flight from Frankfurt to Detroit airports. The cruising phase, detected from thresholds on the pressure (horizontal solid black line) and the absolute difference in pressure change between datapoints (horizontal dashed solid line), is shown in red. See main text for details.

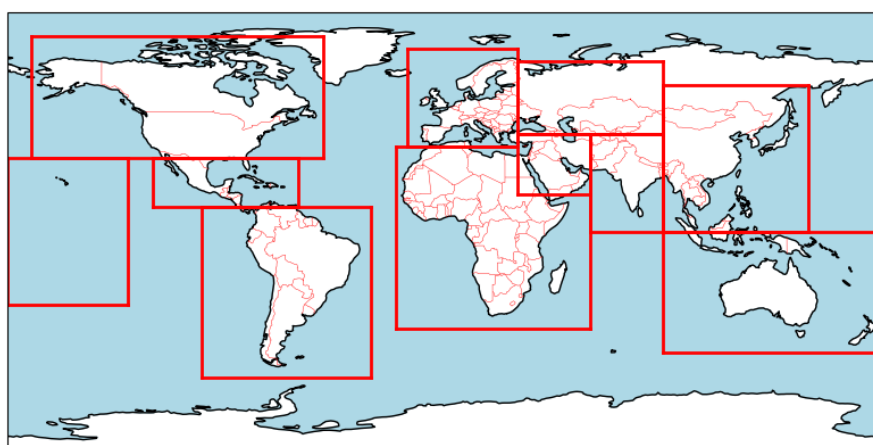

**Figure S2.** World regions considered to categorize IAGOS flights by origin and destination airports. The regions are (from west to east) Pacific, North America, Central America, South America, Africa, Europe, Central Asia, Middle East, South-East Asia, Asia, and Australasia.

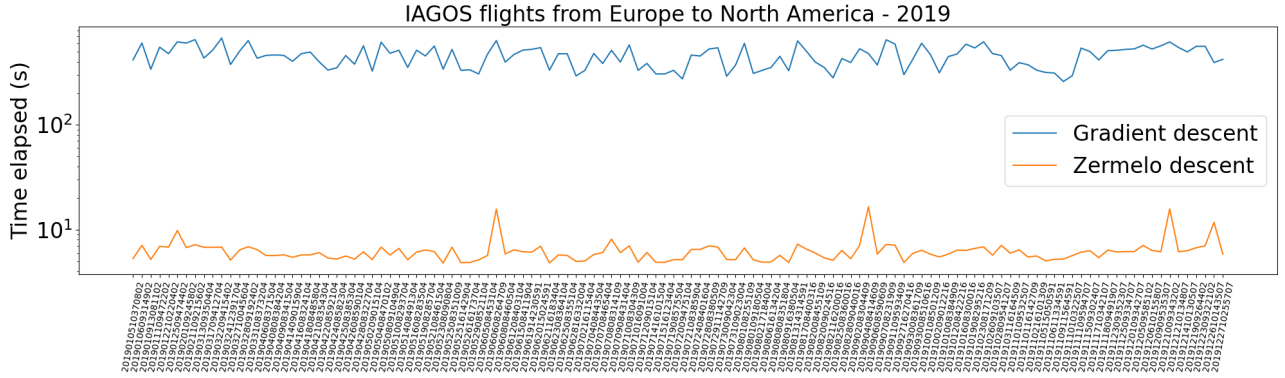

**Figure S3.** Computational time as a function of individual flights for the Europe to North America 2019 IAGOS flights and for our two optimization methods. Note that the  $y$ -axis is on a logarithmic scale. The python scripts are run on a 2.8 GHz AMD EPYC 7402P CPU.

|                         | 2018 | 2018 | 2019 | 2019 | 2020 | 2020 | 2021 | 2021 |
|-------------------------|------|------|------|------|------|------|------|------|
| Aircraft / Airline      | All  | Sel  | All  | Sel  | All  | Sel  | All  | Sel  |
| F-GLZU (A340-313)       | 564  | 444  | 0    | 0    | 0    | 0    | 0    | 0    |
| F-GZCO (A330-203)       | 260  | 195  | 0    | 0    | 0    | 0    | 0    | 0    |
| Total Air France        | 824  | 639  | 0    | 0    | 0    | 0    | 0    | 0    |
| B-HLR (A330-343)        | 428  | 178  | 0    | 0    | 0    | 0    | 0    | 0    |
| Total Cathay Pacific    | 428  | 178  | 0    | 0    | 0    | 0    | 0    | 0    |
| B-18316 (A330-302)      | 182  | 28   | 0    | 0    | 0    | 0    | 0    | 0    |
| B-18317 (A330-302)      | 1105 | 154  | 688  | 109  | 0    | 0    | 0    | 0    |
| Total China Airlines    | 1287 | 182  | 688  | 109  | 0    | 0    | 0    | 0    |
| N384HA (A330-243)       | 720  | 712  | 626  | 621  | 175  | 173  | 51   | 49   |
| Total Hawaiian Airlines | 720  | 712  | 626  | 621  | 175  | 173  | 51   | 49   |
| D-AIGT (A340-313)       | 350  | 331  | 395  | 379  | 151  | 147  | 357  | 337  |
| D-AIKO (A330-343)       | 402  | 251  | 583  | 433  | 297  | 149  | 447  | 351  |
| D-AIHE (A340-642)       | 21   | 20   | 22   | 22   | 8    | 8    | 0    | 0    |
| Total Lufthansa         | 773  | 602  | 1000 | 834  | 456  | 304  | 804  | 688  |
| Grand total             | 4032 | 2313 | 2314 | 1564 | 631  | 477  | 855  | 737  |

**Table S1.** Total (All) and screened (Sel) number of IAGOS flights considered in this study for the different years in the period 2018 to 2021 and the different IAGOS-equipped aircraft. Yearly totals by airline and the grand total are also given.
